# Supplementary material for: Native language resources can illuminate global darkspots in utilized plant species and reduce data shortfalls
Source: Frontiers journal article supplement (doi:10.3389/fsufs.2025.1602755), 2025-06-18
Supplement: Table_1.xlsx [file Table_1.xlsx]

## Sheet: Página1
Table S1. Traditionally used plants from case studies that are not recorded in global datasets* on plant uses.
Country	Reference	Plant species used by IPLCs without register in global datasets	Use category	Indigenous People or local community
Brazil	Yanomami et al. 2015	Alexa confusa	Medicinal	Yanomami Indigenous People
Brazil	Yanomami et al. 2015	Amphirrhox longifolia	Medicinal	Yanomami Indigenous People
Brazil	Yanomami et al. 2015	Anaxagorea acuminata	Medicinal	Yanomami Indigenous People
Brazil	Yanomami et al. 2015	Besleria laxiflora	Medicinal	Yanomami Indigenous People
Brazil	Yanomami et al. 2015	Byrsonima aerugo	Medicinal	Yanomami Indigenous People
Brazil	Yanomami et al. 2015	Calathea aff. mansonis	Medicinal	Yanomami Indigenous People
Brazil	Yanomami et al. 2015	Chrysochlamys weberbaueri	Medicinal	Yanomami Indigenous People
Brazil	Yanomami et al. 2015	Chrysophyllum cf. venezuelanense	Medicinal	Yanomami Indigenous People
Brazil	Yanomami et al. 2015	Clarisia ilicifolia	Medicinal	Yanomami Indigenous People
Brazil	Yanomami et al. 2015	Clusia leprantha	Medicinal	Yanomami Indigenous People
Brazil	Yanomami et al. 2015	Coccoloba excelsa	Medicinal	Yanomami Indigenous People
Brazil	Yanomami et al. 2015	Coccoloba sp.	Medicinal	Yanomami Indigenous People
Brazil	Yanomami et al. 2015	Piper bartlingianum	Medicinal	Yanomami Indigenous People
Brazil	Yanomami et al. 2015	Picramnia spruceana	Medicinal	Yanomami Indigenous People
Brazil	Yanomami et al. 2015	Passiflora miniata	Medicinal	Yanomami Indigenous People
Brazil	Yanomami et al. 2015	Ormosia stipularis	Medicinal	Yanomami Indigenous People
Brazil	Yanomami et al. 2015	Mendoncia aspera	Medicinal	Yanomami Indigenous People
Brazil	Yanomami et al. 2015	Maquira guianensis	Medicinal	Yanomami Indigenous People
Brazil	Yanomami et al. 2015	Inga acuminata	Medicinal	Yanomami Indigenous People
Brazil	Yanomami et al. 2015	Faramea brevipes	Medicinal	Yanomami Indigenous People
Brazil	Yanomami et al. 2015	Duguetia lepidota	Medicinal	Yanomami Indigenous People
Brazil	Yanomami et al. 2015	Dieffenbachia millikenii	Medicinal	Yanomami Indigenous People
Brazil	Yanomami et al. 2015	Piper francovilleanum	Medicinal	Yanomami Indigenous People
Brazil	Yanomami et al. 2015	Polybotrya caudata	Medicinal	Yanomami Indigenous People
Brazil	Yanomami et al. 2015	Pourouma bicolor	Medicinal	Yanomami Indigenous People
Brazil	Yanomami et al. 2015	Protium fimbriatum	Medicinal	Yanomami Indigenous People
Brazil	Yanomami et al. 2015	Pseudolmedia laevigata	Medicinal	Yanomami Indigenous People
Brazil	Yanomami et al. 2015	Rinorea lindenian	Medicinal	Yanomami Indigenous People
Brazil	Yanomami et al. 2015	Sciaphila purpurea	Medicinal	Yanomami Indigenous People
Brazil	Yanomami et al. 2015	Siparuna decipiens	Medicinal	Yanomami Indigenous People
Brazil	Yanomami et al. 2015	Telitoxicum krukovii	Medicinal	Yanomami Indigenous People
Brazil	Yanomami et al. 2015	Zollernia grandifolia	Medicinal	Yanomami Indigenous People
Brazil	Echer et al. 2021	Nothoscordum gracile	Food	Family farmers from Canguçu, Cerrito and Pelotas
Brazil	Echer et al. 2021	Annona rugulosa	Food	Family farmers from Canguçu, Cerrito and Pelotas
Brazil	Echer et al. 2021	Butia odorata	Food	Family farmers from Canguçu, Cerrito and Pelotas
Brazil	Echer et al. 2021	Melothria cucumis	Food	Family farmers from Canguçu, Cerrito and Pelotas
Brazil	Echer et al. 2021	Erythroxylum argentinum	Food	Family farmers from Canguçu, Cerrito and Pelotas
Brazil	Echer et al. 2021	Sinningia macrostachya	Food	Family farmers from Canguçu, Cerrito and Pelotas
Brazil	Echer et al. 2021	Ficus cestrifolia	Food	Family farmers from Canguçu, Cerrito and Pelotas
Brazil	Echer et al. 2021	Campomanesia guazumifolia	Food	Family farmers from Canguçu, Cerrito and Pelotas
Brazil	Echer et al. 2021	Eugenia uruguayensis	Food	Family farmers from Canguçu, Cerrito and Pelotas
Brazil	Echer et al. 2021	Myrcia palustris	Food	Family farmers from Canguçu, Cerrito and Pelotas
Brazil	Echer et al. 2021	Podocarpus lambertii	Food	Family farmers from Canguçu, Cerrito and Pelotas
Brazil	Echer et al. 2021	Citharexylum montevidense	Food	Family farmers from Canguçu, Cerrito and Pelotas
Brazil	Negreiros 2017	Eugenia luschnathiana	Food/wood	Jenipapo-Karindé Indigenous People
Brazil	Negreiros 2017	Maytenus erythroxyla	Food/wood	Jenipapo-Karindé Indigenous People
Brazil	Negreiros 2017	Poincianella pymaridalis	Fuel/feed/wood/medicinal	Jenipapo-Karindé Indigenous People
Brazil	Negreiros 2017	Tocoyena sellowiana	Body painting	Jenipapo-Karindé Indigenous People
*Kew's Medicinal Plant Names Service; Kew's Economic Botany Collection
